# Supplementary material for: The human long non-coding RNA-RoR is a p53 repressor in response to DNA damage
Source: PubMed Central journal article supplement — Cell Res. 2012 Dec 4;23(3):340–50. doi: 10.1038/cr.2012.164 (PMC3587705; doi:10.1038/cr.2012.164), 2012-12-04
Supplement: cr2012164x1.pdf [file cr2012164x1.pdf]

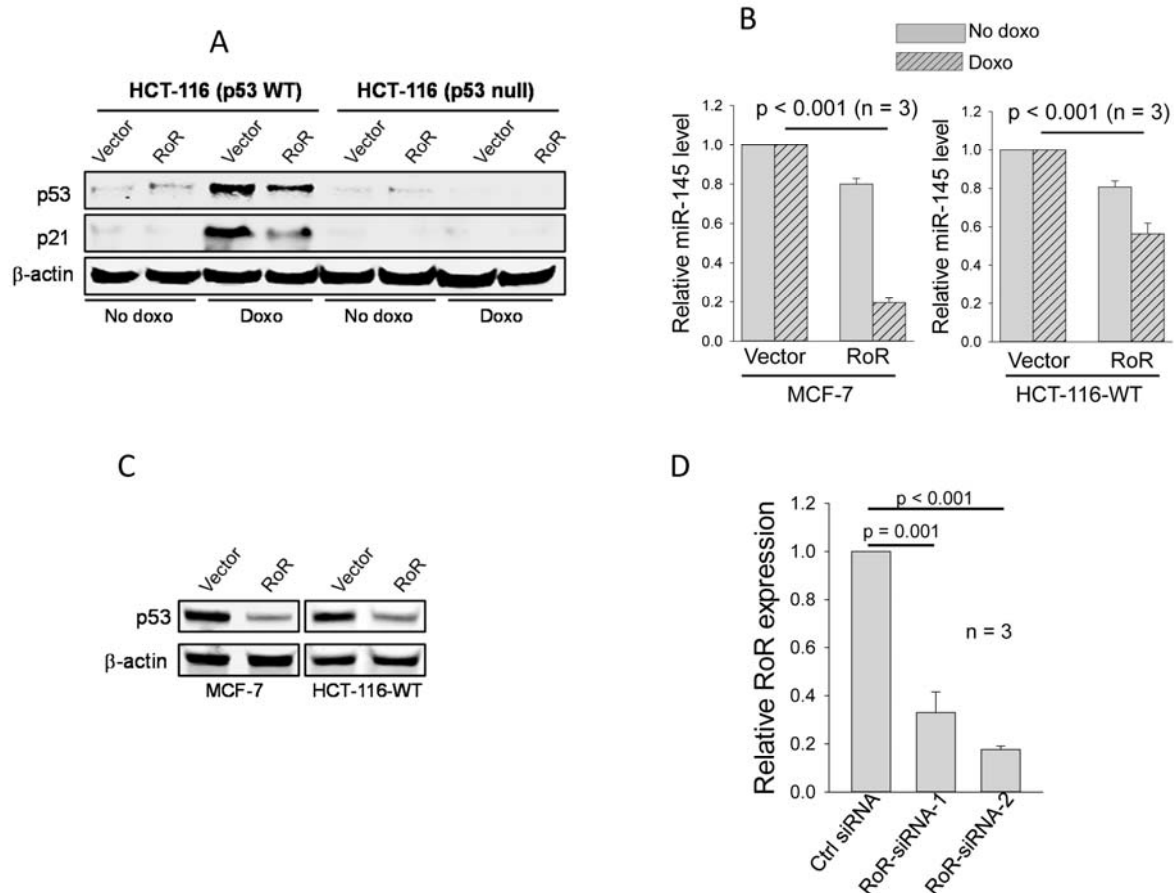

**Supplementary information, Figure S1** RoR suppresses the DNA damage-induced p53 protein level.

(A) Suppression of the doxo-induced p53 by RoR. HCT-116 cells were transfected with vector or RoR and then treated with doxo at 1  $\mu\text{g}/\text{ml}$  for 24 h. Total cellular protein was extracted for western blot. (B) Suppression of the p53 target miR-145 by RoR in MCF-7 and HCT-116 WT cells, as detected by qRT-PCR. Relative miR-145 level was normalized by vector control as 1 for no doxo or doxo. (C) RoR suppresses the UVC-induced p53. Transfected MCF-7 or HCT-116 WT cells were first UVC-irradiated at 10  $\text{J}/\text{m}^2$  and then cultured for 24 h before harvesting cells for western. (D) Knockdown of RoR by RNAi.
