# Supplementary material for: The human long non-coding RNA-RoR is a p53 repressor in response to DNA damage
Source: PubMed Central journal article supplement — Cell Res. 2012 Dec 4;23(3):340–50. doi: 10.1038/cr.2012.164 (PMC3587705; doi:10.1038/cr.2012.164), 2012-12-04
Supplement: cr2012164x2.pdf [file cr2012164x2.pdf]

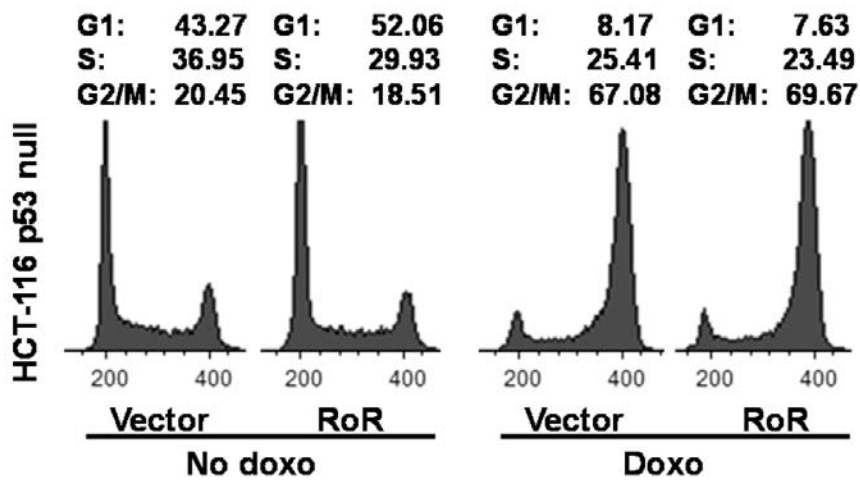

**Supplementary information, Figure S2** RoR has no effect on the doxo-induced G2/M arrest in HCT-116 p53 null cells.

Cells were transfected with vector or RoR, and then treated with doxo at 0.1 µg/ml for 24 h, followed by FACS cell cycle analysis.
