# Supplementary material for: The human long non-coding RNA-RoR is a p53 repressor in response to DNA damage
Source: PubMed Central journal article supplement — Cell Res. 2012 Dec 4;23(3):340–50. doi: 10.1038/cr.2012.164 (PMC3587705; doi:10.1038/cr.2012.164), 2012-12-04
Supplement: cr2012164x3.pdf [file cr2012164x3.pdf]

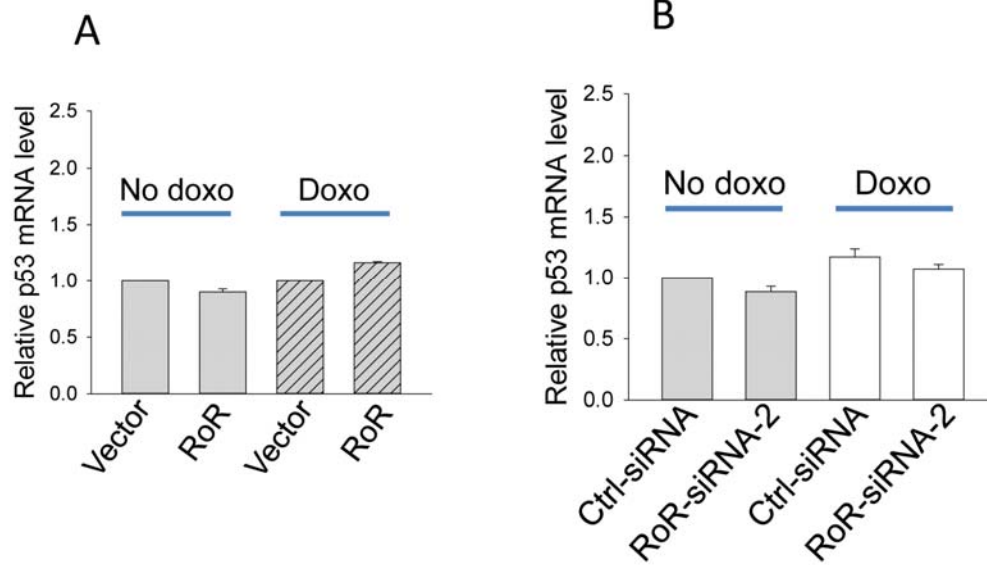

**Supplementary information, Figure S3** RoR has no effect on p53 mRNA, as detected by qRT-PCR.

(A) MCF-7 cells were first transfected with vector or RoR. For doxo treatment (1  $\mu\text{g/ml}$ ), the transfected cells were then cultured for another 24 h. (B) The experiment was done the same way as in (A) except that siRNA was used for transfection. Values are means  $\pm$  SE (n = 3). No significant difference was seen.
