# Supplementary material for: The human long non-coding RNA-RoR is a p53 repressor in response to DNA damage
Source: PubMed Central journal article supplement — Cell Res. 2012 Dec 4;23(3):340–50. doi: 10.1038/cr.2012.164 (PMC3587705; doi:10.1038/cr.2012.164), 2012-12-04
Supplement: cr2012164x4.pdf [file cr2012164x4.pdf]

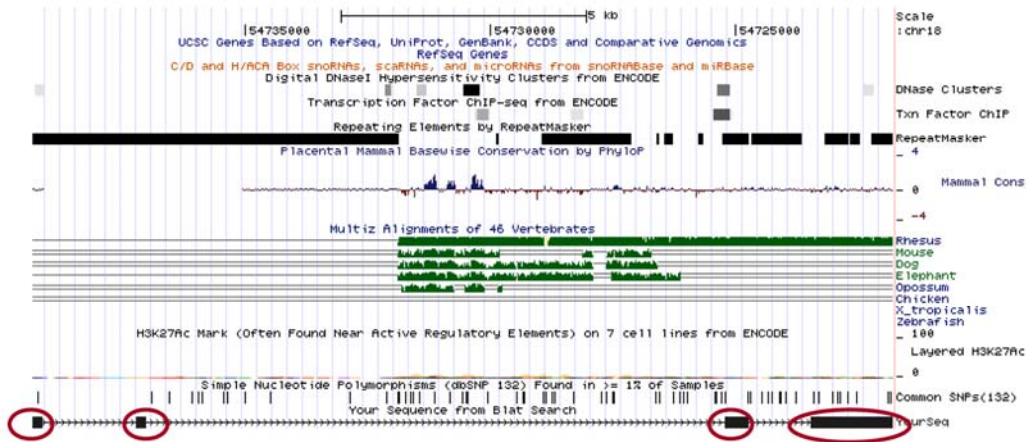

UCSC genome browser identified no conservation of ROR, see the link :  
[http://genome.ucsc.edu/cgi-bin/hgTracks?position=chr18:54721802-54739350&db=hg19&ss=../trash/hgSs/hgSs\\_genome\\_38ff\\_1cef90.pslx+../trash/hgSs/hgSs\\_genome\\_38ff\\_1cef90.fa&hgside=219146885](http://genome.ucsc.edu/cgi-bin/hgTracks?position=chr18:54721802-54739350&db=hg19&ss=../trash/hgSs/hgSs_genome_38ff_1cef90.pslx+../trash/hgSs/hgSs_genome_38ff_1cef90.fa&hgside=219146885)

**Supplementary information, Figure S4 A** UCSC genome browser search identified no RoR counterpart from mouse, dog, elephant, opossum or chicken. Human RoR exons were in red circles.
