# Supplementary material for: The human long non-coding RNA-RoR is a p53 repressor in response to DNA damage
Source: PubMed Central journal article supplement — Cell Res. 2012 Dec 4;23(3):340–50. doi: 10.1038/cr.2012.164 (PMC3587705; doi:10.1038/cr.2012.164), 2012-12-04
Supplement: cr2012164x5.pdf [file cr2012164x5.pdf]

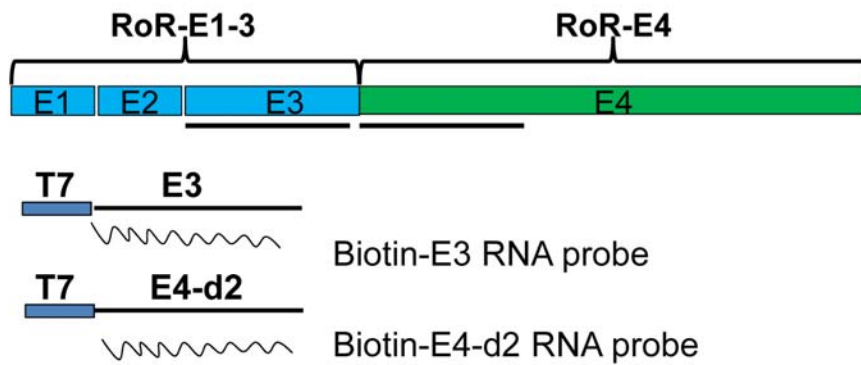

- **Mix with cellular extract**
- **Pulldown by avidin beads**
- **Separation in SDS PAGE**
- **Silver staining**

**Supplementary information, Figure S5** A procedure for preparation of biotin-labeled RoR probes.

DNA fragments E3 or E4-d2 were PCR amplified and cloned into pCR8 vector and then linearized with restriction enzyme Not I, and in vitro transcribed using T7 polymerase in the presence of biotin-UTP. Total cellular extract was used for RNA precipitation.
