# Supplementary material for: The human long non-coding RNA-RoR is a p53 repressor in response to DNA damage
Source: PubMed Central journal article supplement — Cell Res. 2012 Dec 4;23(3):340–50. doi: 10.1038/cr.2012.164 (PMC3587705; doi:10.1038/cr.2012.164), 2012-12-04
Supplement: cr2012164x6.pdf [file cr2012164x6.pdf]

A

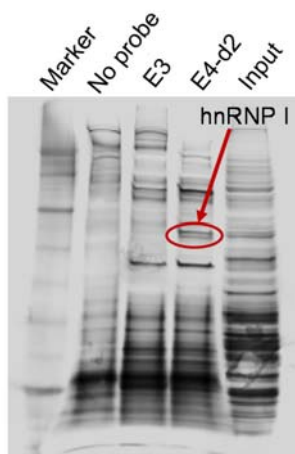

B

#### Identified peptides from mass spectrometry analysis

|                      |                         |
|----------------------|-------------------------|
| LHGKPIR              | IAIPGLAGAGNSVLLVSNLNPER |
| VTNLLMLK             | NQAFIEMNTEEAANTMV       |
| HQNVQLPR             | NYTTSVTPVLR             |
| DYGN SPLHR           | RGSDLEFSTCVTNGPFIM      |
| GQPIYIQFSNHK         | SSNSASAANGNSK           |
| VTPQSLFILFGVYGDVQR   | AQALQAVNSVQSGNLA        |
| NNQFQALLQYADPVSAQHAK | LAASAAVDAGMAMAGQSPVLR   |

#### hnRNP I (NM\_002819)

```

MDGIVPDIAVGTGRGSDLEFSTCVTNGPFIMSSNSASAANGNSKFKFGDSRSAGVPSRVIHIRKLPIDV
TEGEVLSLGLPFGKVTNLLMLKGKNQAFIEMNTEEAANTMVNYTTSVTPVLRGQPIYIQFSNHKELKTD
SPNQARAQAALQAVNSVQSGNLA LAASAAVDAGMAMAGQSPVLR IIVENLFYPTLDVLDVHQI PSKFGTV
LKIITFTKNNQFQALLQYADPVSAQHAKLSLDGQNIYNACCTLRIDFSKLTSLNVKYNNDKSRDYTRPDL
PSGDSQPSLDQTMAAAFGAPGII SASPYAGAGFPPTFAIPQAAGLSVNVHGALAPLAIPSA AAAAAAAG
RIAIPGLAGAGNSVLLVSNLNPERVTPQSLFILFGVYGDVQRVKILFNKKNALVQMDGNQQLAMSHL
NGHKLHGKPIRITLSKHQNVQLPREGQEDQGLTKDYGNSPLHRFKKPGSKNFQNIFFPSATLHLSNI PPS
VSEEDLKVLFSSNGGVVKGKFFQKDRKMALIQMGSV EEAVALIDLHNDLGENHHLRVSFSKSTI

```

**Supplementary information, Figure S6** Identification of hnRNP I as a potential RoR-binding protein.

(A) Another representative silver-stained gel picture derived from RNA precipitation using a separately prepared sample. (B) All peptides from mass spectrometry analysis matched with those from the hnRNP I sequence (bottom). Red and green colors were used for separation purposes.
