# Supplementary material for: The human long non-coding RNA-RoR is a p53 repressor in response to DNA damage
Source: PubMed Central journal article supplement — Cell Res. 2012 Dec 4;23(3):340–50. doi: 10.1038/cr.2012.164 (PMC3587705; doi:10.1038/cr.2012.164), 2012-12-04
Supplement: cr2012164x7.pdf [file cr2012164x7.pdf]

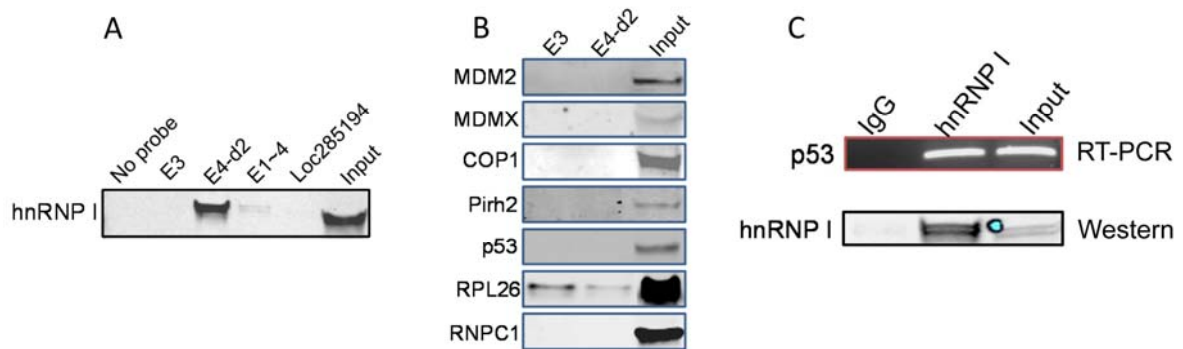

**Supplementary information, Figure S7** Interaction of hnRNP I with RoR and p53 mRNA.

(A) Detection of hnRNP I from RNA precipitation by western blot using hnRNP I antibody. To better assess the specific interaction between RoR and hnRNP I, we included another lncRNA probe (Loc285194). At the same time, we also included the full-length RoR (E1~4) probe. It is evident that E4-d2 is more efficient in precipitating hnRNP I than E1~4, based on the signal intensity. The same amount protein was used for RNA precipitation. (B) RoR does not interact with MDM2, MDMX, COP1, Pirh2, p53, RPL26 or RNPC1. The picture for RPL26 was composed from the same gel with the same contrast. A faint band was detected, but non-specifically interacted with both E3 and E4-d2. (C) hnRNP I binds to p53 mRNA, as detected by RNA immunoprecipitation with hnRNP I antibody followed by RT-PCR using primers p53-RT-5.1 and p53-RT-3.1. Pulldown of hnRNP I was confirmed by western (bottom panel)
