# Supplementary material for: The human long non-coding RNA-RoR is a p53 repressor in response to DNA damage
Source: PubMed Central journal article supplement — Cell Res. 2012 Dec 4;23(3):340–50. doi: 10.1038/cr.2012.164 (PMC3587705; doi:10.1038/cr.2012.164), 2012-12-04
Supplement: cr2012164x8.pdf [file cr2012164x8.pdf]

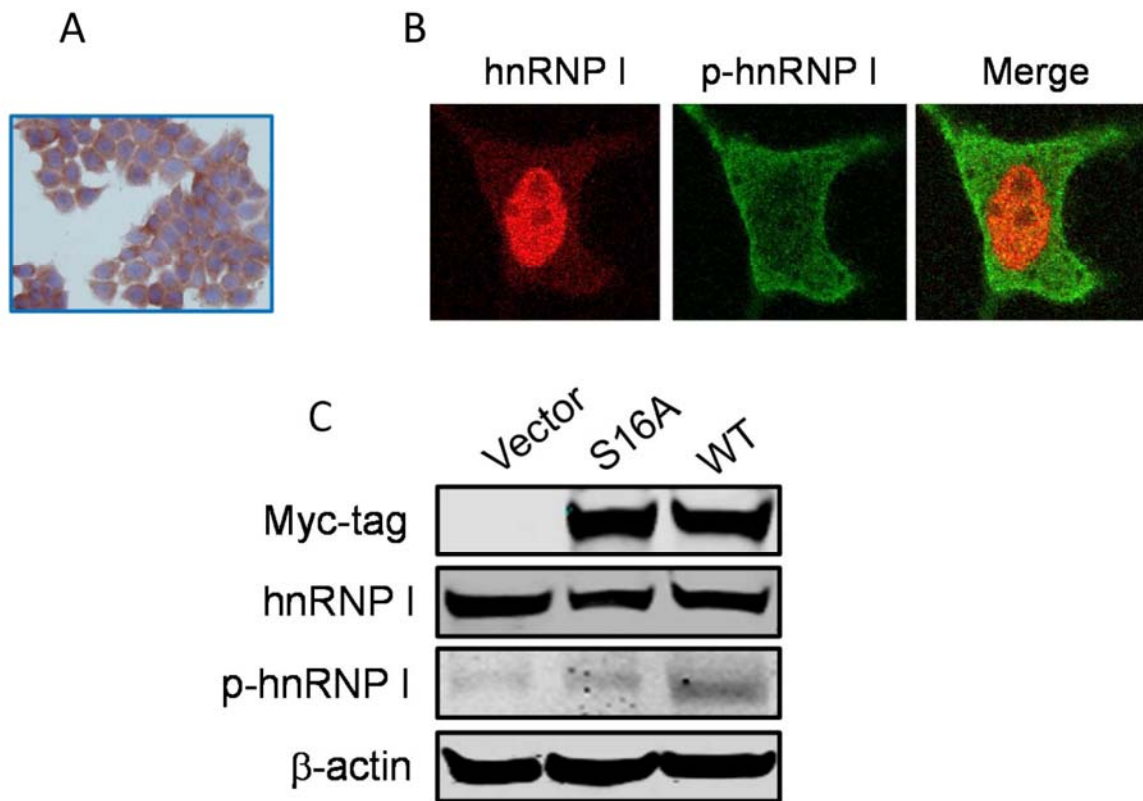

**Supplementary information, Figure S8** (A) RoR is predominantly in the cytoplasm (MCF-7 cells) as detected by in situ hybridization.

(B) p-hnRNP I is in the cytoplasm whereas hnRNP I is in the nucleus. MCF-7 cells were stained with antibody against hnRNP I or p-hnRNP I, followed by secondary antibody labeled with Alexa Flour 488 or 568.

(C) Detection of Myc-tagged hnRNP I WT or mutant (S16A) in the cells after transfection by Myc tag antibody.
