# Supplementary material for: The human long non-coding RNA-RoR is a p53 repressor in response to DNA damage
Source: PubMed Central journal article supplement — Cell Res. 2012 Dec 4;23(3):340–50. doi: 10.1038/cr.2012.164 (PMC3587705; doi:10.1038/cr.2012.164), 2012-12-04
Supplement: cr2012164x9.pdf [file cr2012164x9.pdf]

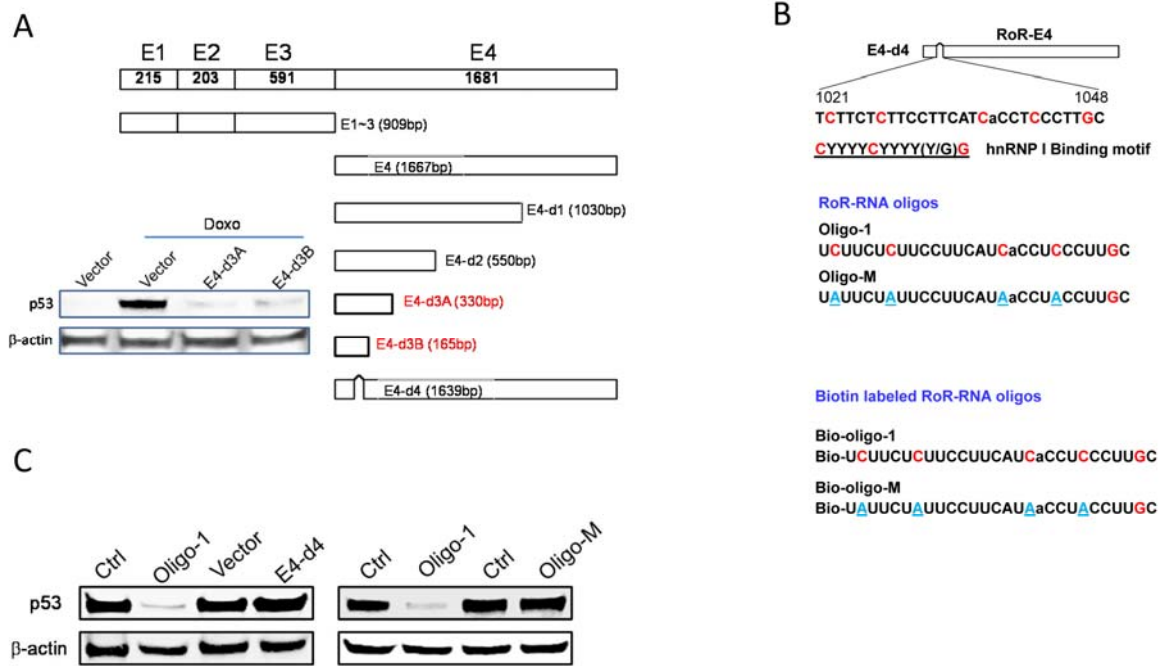

**Supplementary information, Figure S9** Identification of an active region in RoR responsible for p53 repression.

(A) Further deletion identifies a 165-bp fragment of RoR (E4-d3B) is sufficient for p53 repression. (B) E4-d4, a 28-base RoR sequence, RoR-oligo-1 and RoR-oligo-M used for Fig. 5G & 5H and Fig. S9C. (C) Western blot showing suppression of the doxo-induced p53 by RoR-oligo-1, not RoR-oligo-M.
