# Supplementary material for: The human long non-coding RNA-RoR is a p53 repressor in response to DNA damage
Source: PubMed Central journal article supplement — Cell Res. 2012 Dec 4;23(3):340–50. doi: 10.1038/cr.2012.164 (PMC3587705; doi:10.1038/cr.2012.164), 2012-12-04
Supplement: cr2012164x10.pdf [file cr2012164x10.pdf]

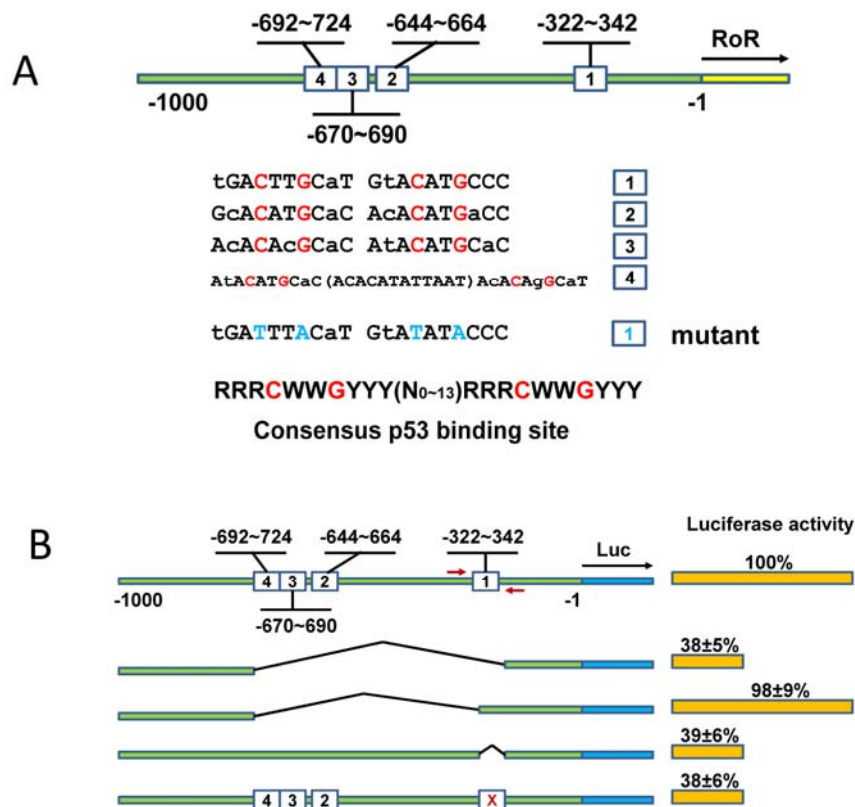

**Supplementary information, Figure S10** p53 induces RoR by binding to p53RE in the RoR promoter.

(A) Schematic description of potential p53 response elements in the upstream region of RoR. Relative positions of each p53 binding site are indicated by nucleotide numbers along with the consensus p53 binding site. Also shown is mutant p53RE-1 used in Fig. S10B. R, purine (A or G); W, C or T; Y, pyrimidine (C or T). (B) Deletion and site-directed mutagenesis identify p53RE-1 as an important site for the p53-mediated induction of the promoter activity. Relative expression of p53-induced promoter activity was normalized against the full length promoter as 100%. Values are means  $\pm$  SE (n = 3).
