# Supplementary material for: The human long non-coding RNA-RoR is a p53 repressor in response to DNA damage
Source: PubMed Central journal article supplement — Cell Res. 2012 Dec 4;23(3):340–50. doi: 10.1038/cr.2012.164 (PMC3587705; doi:10.1038/cr.2012.164), 2012-12-04
Supplement: cr2012164x11.pdf [file cr2012164x11.pdf]

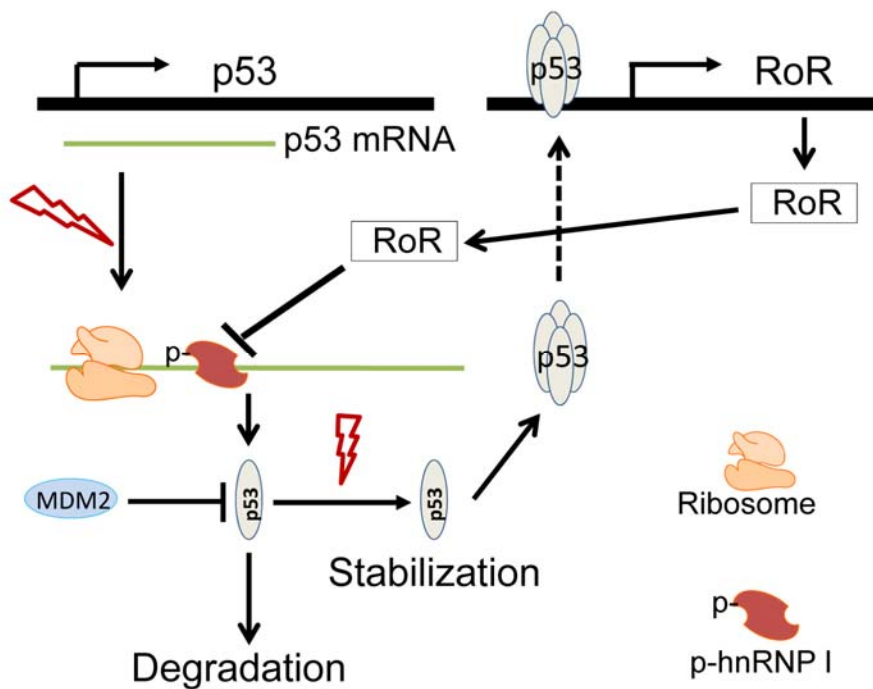

**Supplementary information, Figure S11** The RoR-p53 autoregulatory feedback loop.

DNA damage (⚡) stimulates p53 translation and increases the p53 stability whereas MDM2 inhibits p53 by degradation through the ubiquitin-proteasome pathway. On the other hand, p-hnRNP I stimulates p53 translation upon DNA damage, whereas RoR suppresses p53 possibly by blocking p-hnRNP I to bind to p53 mRNA. The detail mechanism still remains to be determined yet. An induction of p53 causes upregulation of RoR which then comes back into the loop.
