# Supplementary material for: The human long non-coding RNA-RoR is a p53 repressor in response to DNA damage
Source: PubMed Central journal article supplement — Cell Res. 2012 Dec 4;23(3):340–50. doi: 10.1038/cr.2012.164 (PMC3587705; doi:10.1038/cr.2012.164), 2012-12-04
Supplement: cr2012164x12.pdf [file cr2012164x12.pdf]

## Supplementary information, Table S1 Primers used in this study

### Cloning primers

RoR-R1-5.1      ATTCTAGAGCTAGCGAATTCGGTGAAATAAACAGCCATGT  
RoR-Not1-3.1    TCGCAGATCCTTGCGGCCGCTTTTATTTTTTTGAGGAACTGTC  
RoR-R1-5.2      ATTCTAGAGCTAGCGAATTCAGTTCTTCCAGGTCTCAGGA  
RoR-Not1-3.2    TCGCAGATCCTTGCGGCCGATAACTCATAAGTGGAGCAG  
RoR-Exon4-Not1-3.1 (E4-d2)  
                  TCGCAGATCCTTGCGGCCGATTGTAGTCATAGTGCCAT  
RoR-Exon4-Not1-3.2 (E4-d1)  
                  TCGCAGATCCTTGCGGCCGCTAACCTCAAAGCAAGAGCAT  
RoR-d-BS-5.1    CCTGTCCACTTCCACTCCAAACACCTGATAACCTCGAAA  
RoR-d-BS-3.1    TTTTCGAGTTATCAGGGTGTGGAGTGAAGTGGACAGG

RPL26-Myc-R1-5.1      CCATGGAGGCCCGAATTCTGAAGTTTAATCCCTTTGTG  
RPL26-Not1-3.1      TCGCAGATCCTTGCGGCCGCTTATTCCTGCATCTTCTCAA

hnRNP I-Myc-R1-5.1    CCATGGAGGCCCGAATTCTGGACGGCATTGTCCCAGA  
hnRNP I-Not1-3.1      TCGCAGATCCTTGCGGCCGCTTAGATGGTGGACTTGGAGA  
hnRNP I-5.2 (S15A)  
                  TGGACGGCATTGTCCCAGATATAGCCGTTGGTACAAAGCGGGGAGCTGACGAGC

PKA-myc-R1-5.1      CCATGGAGGCCCGAATTCTGGGCAACGCCGCCGCCGCC  
PKA-Not1-3.1      TCGCAGATCCTTGCGGCCGCGGGGCACAGGCATGCCCTA

### Primers for in vitro transcription

T7-RoR-Exon3-5.1    TAATACGACTCACTATAGGGAGAAACACAACACTACAGATTTTC  
RoR-Exon3-Not1-3.1    GCGGCCGCATAACTCATAAGTGGAGCAG  
T7-RoR-Exon4-5.1    TAATACGACTCACTATAGGGGTTCTTCCAGGTCTCAGGAA  
RoR-Exon4-Not1-3.1    GCGGCCGCGATTGTAGTCATAGTGCCAT

### Primers for cloning the RoR promoter

RoRp-Xho1-5.1      CGTGCTAGCCCAGGCTCGAGCTGCCCCACACACTTTTATTA  
RoRp-Xho1-3.1      CTTAGATCGCAGATCTCGAGTGGGTGCAGGCCGGCTGAGT  
RoRp-d-4xp53-5.1    ACACACACATATGCACACACATGGCCTGAAGTAACTGAAG  
RoRp-d-4xp53-3.1    CTTTCAGTTACTTTCAGGCCATGTGTGTGCATATGTGTGTGT  
RoRp-d-3xp53-5.1    ACACACACATATGCACACACTAATAACAAGTGCACACACAC  
RoRp-d-3xp53-3.1    GTGTGTGTGCACTTGTATTAGTGTGTGCATATGTGTGTGT  
RoRp-d-1xp53-5.1    CCAAGCCATTGCATCCCCTGATGGCCTGAAGTAACTGAAG  
RoRp-d-1xp53-3.1    CTTTCAGTTACTTTCAGGCCATCAGGGGATGCAATGGCTTGG  
RoRp-m-p53RE1-5.1    GTGCATCCCCTGTGATTTACATGTATATACCCAGATGGCCTGA  
RoRp-m-p53RE1-3.1    TCAGGCCATCTGGGTATATACATGTAAATCACAGGGGATGCAC

### Primers for ChIP assays

RoR-ChIP-Ctrl-5.1    AAATGTATCTGTCTGATGCC  
RoR-ChIP-Ctrl-3.1    CATGAATACCAGCTCCAGTG  
RoR-ChIP-p53-1-5.1A ACCTCATAAGCACAAATCC

RoR-ChIP-p53-1-3.1A GGCAGGGCATTTTCACTTCT

#### qRT-PCR primers

ROR-Exon4-RT-5.1A GCCTGAGAGTTGGCATGAAT  
ROR-Exon4-RT-3.1A AAAACCTCACTCCCATGTGC  
ROR-Exon3-RT-5.1 CTTGATGGCATTGTGCTAA  
ROR-Exon3-RT-3.1 TCCAGTGGCTGTGCTAGATG  
p53-RT-5.1 GTTCCGAGAGCTGAATGAGG  
p53-RT-3.1 TCTGAGTCAGGCCCTTCTGT

#### LNA oligo for ISH

/Biotin/G+C+G+ATGTGTTT+G+GAACAGAGCC+T+T+G

#### RNA oligos

##### RoR-hnRNP I-BS-RNA (RoR-oligo-1)

UCUUCUCUCCUUCAUCACCUCCCUUGC

##### RoR-hnRNP I-BS-m-RNA (RoR-oligo-M)

UAUUCUAUCCUUCAUAACCUACCUUGC

##### Biotin labeled RoR-BS-RNA (Bio-oligo-1)

Biotin-UCUUCUCUCCUUCAUCACCUCCCUUGC

##### Biotin labeled RoR-BS-m-RNA (Bio-oligo-M)

Biotin-UAUUCUAUCCUUCAUAACCUACCUUGC
